# Supplementary material
Source: MDPI journal article supplement (https://www.mdpi.com/2220-9964/13/4/122)
Supplement: s1 [file s1]

Supplementary material for

**Balancing Flood Control and Economic Development in Flood**

**Detention Areas of the Yangtze River Basin**

Siyuan Liao <sup>1</sup>, Chao Wang <sup>1,2,3,\*</sup>, Renke Ji <sup>1</sup>, Xiang Zhang <sup>2,4</sup>, Zhifei Wang <sup>5</sup>, Wei Wang <sup>1</sup>, Nengcheng Chen <sup>2</sup>

1 State Key Laboratory of Information Engineering in Surveying, Mapping and Remote Sensing, Hubei LuoJia Laboratory, Wuhan University, Wuhan 430079, China

2 National Engineering Research Center of Geographic Information System, School of Geography and Information Engineering, China University of Geosciences (Wuhan), Wuhan, 430074, China

3 Key Laboratory of Basin Water Resources and Eco-Environmental Science in Hubei Province, Changjiang River Scientific Research Institute of Changjiang Water Resources Commission, Wuhan, 430010, China

4 SongShan Laboratory, Zhengzhou 450046, China

5 Bureau of Hydrology, Changjiang Water Resources Commission, Wuhan 430010, China

Correspondence: Wang Chao(c.wang@whu.edu.cn)

**Contents of this file**

Table S1 to S8

**Outline**

Table S1. The flood detention areas.

Table S2. The changes of proportion of impervious.

Table S3. The growth rate of impervious.

Table S4. The changes in GDP per unit area in nine comparative regions from 1995 to 2020.

Table S5. The changes in GDP growth rate in nine comparative regions from 1995 to 2020.

Table S6. The comparison of flood control value distribution of FDA in YRB.

Table S7. The change of economic value per unit area in FDA of YRB from 1995 to 2020.

Table S8. The validation accuracy of FCV.

**Details**

**Table S1.** The flood detention areas.

| Flood<br>Detention<br>Areas | Area(km <sup>2</sup> ) | Grade(4:key FDA,<br>3:important FDA,<br>2:general FDA,<br>1:reserve FDA) | Storage<br>capacity(billion<br>m <sup>3</sup> ) | Utilizations<br>status(activation<br>times,from 1954<br>to 2020) | Inundation<br>loss(10000CNY/km <sup>2</sup> ,<br>based on the economic<br>level of 2020) |
|-----------------------------|------------------------|--------------------------------------------------------------------------|-------------------------------------------------|------------------------------------------------------------------|------------------------------------------------------------------------------------------|
|                             |                        |                                                                          |                                                 |                                                                  |                                                                                          |

|                 |        |   |       |    |             |
|-----------------|--------|---|-------|----|-------------|
| Jingjiang       | 922.1  | 4 | 54.09 | 5  | 99.53788907 |
| Yuanshi         | 95.2   | 2 | 2.57  | 0  | 96.76206502 |
| Renmindayuan    | 354.9  | 2 | 11.8  | 0  | 92.71483646 |
| Huxi            | 88.8   | 2 | 3.81  | 1  | 84.82584915 |
| Weidihu         | 34.6   | 3 | 2.22  | 2  | 89.9421844  |
| Liujaoshan      | 29.6   | 1 | 0.61  | 0  | 92.04530947 |
| Jiuyuan         | 56.8   | 2 | 3.82  | 0  | 86.54585479 |
| Xiguan          | 73.8   | 3 | 4.76  | 2  | 90.36150455 |
| Anli            | 136.5  | 1 | 9.42  | 0  | 87.34919351 |
| Li'nan          | 38.3   | 3 | 2.21  | 2  | 101.7956627 |
| Anchang         | 118.6  | 1 | 7.23  | 0  | 85.8450386  |
| Anhua           | 87.2   | 1 | 4.72  | 0  | 87.38477034 |
| Nanding         | 46.6   | 1 | 2.2   | 0  | 85.44635973 |
| Hekang          | 96.6   | 1 | 6.16  | 0  | 85.47638723 |
| Nanhan          | 97.7   | 1 | 6.15  | 0  | 87.7726865  |
| Minzhu          | 213    | 3 | 11.96 | 1  | 92.13130895 |
| Gongshuangcha   | 283.6  | 3 | 15.04 | 1  | 92.56779706 |
| Chengxi         | 110    | 3 | 7.92  | 0  | 103.5121913 |
| Beihu           | 24.7   | 1 | 1.91  | 0  | 97.3262915  |
| Yihe            | 9.6    | 1 | 0.79  | 0  | 97.99435201 |
| Quyuan          | 213.8  | 2 | 12.45 | 0  | 114.261591  |
| Jicheng'anhe    | 131.3  | 1 | 6.26  | 0  | 85.85071088 |
| Qianlianghu     | 506    | 3 | 23.78 | 1  | 94.37569576 |
| Jianshe         | 63.7   | 3 | 3.54  | 0  | 92.42012811 |
| Jianxin         | 45.8   | 2 | 1.56  | 0  | 98.4583719  |
| Junshan         | 91.2   | 1 | 4.69  | 0  | 126.5245465 |
| Datonghudong    | 217    | 3 | 11.67 | 1  | 88.21018468 |
| Jiangnanlucheng | 360.1  | 2 | 10.48 | 0  | 103.4198442 |
| Honghu west     | 866.3  | 1 | 49.75 | 0  | 96.59955276 |
| Honghu middle   | 1036.2 | 2 | 67.23 | 0  | 114.7290661 |
| Honghu east     | 886.6  | 3 | 62.42 | 0  | 99.42263676 |
| Xilianghu       | 1110.9 | 2 | 45.01 | 0  | 106.5910534 |
| Dongxihu        | 460.5  | 1 | 21.99 | 0  | 172.9954332 |
| Wuhu            | 301.7  | 2 | 14.99 | 0  | 128.1776273 |
| Zhangduhu       | 435.8  | 2 | 18.17 | 0  | 106.496108  |
| Baitanhu        | 231.3  | 2 | 6.88  | 0  | 178.0486157 |
| Dujiatai        | 668.8  | 3 | 22.9  | 20 | 108.7272198 |
| Kangshan        | 324.5  | 3 | 15.01 | 1  | 106.900452  |
| Zhuhu           | 223.3  | 2 | 4.63  | 0  | 113.3855888 |
| Huanghu         | 49.8   | 2 | 2.87  | 0  | 87.81020707 |
| Fangzhouxietang | 36.2   | 2 | 2.01  | 0  | 93.04095148 |
| Huayanghe       | 1602.9 | 2 | 25.03 | 0  | 112.4333347 |

**Table S2.** The changes of proportion of impervious.

| Comparsion Areas | 1995        | 2000        | 2005        | 2010        | 2015        | 2020        |
|------------------|-------------|-------------|-------------|-------------|-------------|-------------|
| UA               | 0.018052355 | 0.022281099 | 0.025385086 | 0.030903207 | 0.037199669 | 0.042681211 |
| FDA              | 0.015892313 | 0.021097957 | 0.024542408 | 0.029734828 | 0.037302199 | 0.044451114 |
| wuhan            | 0.045603025 | 0.061353258 | 0.075210942 | 0.100267632 | 0.119912076 | 0.137477615 |
| wuhan_FDA        | 0.017710345 | 0.026408584 | 0.033767551 | 0.046780035 | 0.061298354 | 0.075929364 |
| jingzhou         | 0.016698434 | 0.02153753  | 0.026024563 | 0.030168413 | 0.036070811 | 0.042947558 |
| jingzhou_FDA     | 0.013225668 | 0.01644343  | 0.018756339 | 0.021640522 | 0.027441094 | 0.033328399 |
| nanchang         | 0.046184307 | 0.054059141 | 0.064986368 | 0.077950858 | 0.091476257 | 0.103091545 |
| nanchang_FDA     | 0.020474558 | 0.022024604 | 0.024551527 | 0.027841013 | 0.030741742 | 0.033926562 |
| nation           | 0.013581413 | 0.015907381 | 0.017999045 | 0.020876499 | 0.023954936 | 0.026300827 |

**Table S3.** The growth rate of impervious.

| Comparsion Areas | 1995-2000   | 2000-2005   | 2005-2010   | 2010-2015   | 2015-2020   |
|------------------|-------------|-------------|-------------|-------------|-------------|
| UA               | 0.234248873 | 0.139310322 | 0.217376498 | 0.20374784  | 0.147354586 |
| FDA              | 0.327557381 | 0.163259917 | 0.211569308 | 0.254495216 | 0.191648599 |
| wuhan            | 0.345376944 | 0.225867134 | 0.333152188 | 0.19592009  | 0.146486821 |
| wuhan_FDA        | 0.491138868 | 0.278658152 | 0.385354688 | 0.310352885 | 0.238685189 |
| jingzhou         | 0.289793425 | 0.208335574 | 0.159228407 | 0.195648279 | 0.19064575  |
| jingzhou_FDA     | 0.243296715 | 0.140658558 | 0.153771109 | 0.268042109 | 0.214543393 |
| nanchang         | 0.170508878 | 0.20213468  | 0.199495532 | 0.173511873 | 0.126975981 |
| nanchang_FDA     | 0.07570594  | 0.11473184  | 0.133982948 | 0.104189044 | 0.103599222 |
| nation           | 0.171261136 | 0.131490147 | 0.15986704  | 0.147459425 | 0.097929357 |

**Table S4.** The changes in GDP per unit area in nine comparative regions from 1995 to 2020, measured in ten thousand yuan per square kilometer.

| Comparsion Areas | 1995        | 2000        | 2005        | 2010        | 2015        | 2020        |
|------------------|-------------|-------------|-------------|-------------|-------------|-------------|
| UA               | 389.5606764 | 490.0389008 | 747.3780943 | 1093.867027 | 1430.276184 | 1558.435297 |
| FDA              | 434.2527665 | 548.8627368 | 804.0514428 | 1200.032459 | 1584.831486 | 1733.926511 |
| wuhan            | 2361.960971 | 2988.316924 | 4483.272828 | 6658.566498 | 8621.338251 | 9421.313395 |
| wuhan_FDA        | 1146.182431 | 1457.11322  | 2139.538696 | 3285.247212 | 4314.977915 | 4735.214436 |
| jingzhou         | 315.2761946 | 392.3518289 | 548.762573  | 779.9398973 | 1024.638574 | 1115.163594 |
| jingzhou_FDA     | 211.8649872 | 259.3962782 | 370.5915879 | 530.0771293 | 633.0395603 | 689.897411  |
| nanchang         | 969.0874887 | 1203.556942 | 2118.478485 | 3065.029919 | 3857.399056 | 4217.442276 |
| nanchang_FDA     | 78.09670989 | 92.15602723 | 122.553109  | 165.7242725 | 200.4540075 | 216.1054329 |
| nation           | 337.5663183 | 420.9723539 | 610.809514  | 891.0005813 | 1122.985709 | 1219.223172 |

**Table S5.** The changes in GDP growth rate in nine comparative regions from 1995 to 2020

| Comparsion Areas | 1995-2000   | 2000-2005   | 2005-2010   | 2010-2015   | 2015-2020   |
|------------------|-------------|-------------|-------------|-------------|-------------|
| UA               | 0.25792702  | 0.525140337 | 0.463605952 | 0.30754118  | 0.089604451 |
| FDA              | 0.26392456  | 0.464940848 | 0.492482191 | 0.320657182 | 0.094076264 |
| wuhan            | 0.265184718 | 0.500266853 | 0.485202162 | 0.294773921 | 0.092790135 |

|              |             |             |             |             |             |
|--------------|-------------|-------------|-------------|-------------|-------------|
| wuhan_FDA    | 0.27127513  | 0.468340735 | 0.535493244 | 0.313440858 | 0.09739019  |
| jingzhou     | 0.2444702   | 0.398649203 | 0.42127021  | 0.313740428 | 0.088348245 |
| jingzhou_FDA | 0.224347079 | 0.428669642 | 0.430353917 | 0.19424047  | 0.089817216 |
| nanchang     | 0.241948695 | 0.760181352 | 0.446807197 | 0.258519218 | 0.093338339 |
| nanchang_FDA | 0.180024451 | 0.329843665 | 0.352264939 | 0.209563358 | 0.078079882 |
| nation       | 0.247080443 | 0.450949233 | 0.458720863 | 0.260364732 | 0.085697852 |

**Table S6.** The comparison of flood control value distribution of FDA in YRB.

| FDA_NO | 1995yr.     | 2000yr.     | 2005yr.     | 2010yr.      | 2015yr.     | 2020yr.     | change rate(1995-2020) |
|--------|-------------|-------------|-------------|--------------|-------------|-------------|------------------------|
| 1      | 0.061679384 | 0.061651985 | 0.061615773 | 0.061614106  | 0.061559294 | 0.061517142 | -0.002630412           |
| 2      | 0.012649908 | 0.012582972 | 0.012421819 | 0.012392716  | 0.012214324 | 0.012060192 | -0.046618201           |
| 3      | 0.013942034 | 0.013868538 | 0.013801736 | 0.013794843  | 0.013640101 | 0.013532675 | -0.029361488           |
| 4      | 0.024310487 | 0.024275866 | 0.02425444  | 0.024245113  | 0.024232319 | 0.024226326 | -0.003461942           |
| 5      | 0.043891963 | 0.04396043  | 0.043955505 | 0.043916905  | 0.04387124  | 0.043854847 | -0.000845624           |
| 6      | 0.011899986 | 0.011759153 | 0.01169549  | 0.011699866  | 0.011601434 | 0.011687271 | -0.017875254           |
| 7      | 0.018920027 | 0.018747658 | 0.018633939 | 0.018649955  | 0.018634848 | 0.018804279 | -0.006117742           |
| 8      | 0.044118032 | 0.044052996 | 0.043929372 | 0.043913024  | 0.043897241 | 0.043907588 | -0.004770012           |
| 9      | 0.0174793   | 0.017329883 | 0.017259391 | 0.017221826  | 0.017190311 | 0.017228359 | -0.014356467           |
| 10     | 0.04358129  | 0.043434921 | 0.043296648 | 0.043286886  | 0.043262508 | 0.043254266 | -0.007503786           |
| 11     | 0.016358021 | 0.016206606 | 0.016139849 | 0.016098994  | 0.016078372 | 0.016140281 | -0.013310862           |
| 12     | 0.015295711 | 0.015098677 | 0.0149965   | 0.014969678  | 0.014988607 | 0.015107291 | -0.012318484           |
| 13     | 0.014465804 | 0.014364295 | 0.014334108 | 0.014319001  | 0.0143165   | 0.014381747 | -0.005810766           |
| 14     | 0.016706361 | 0.016645773 | 0.016624832 | 0.016611923  | 0.016584882 | 0.016622882 | -0.004996786           |
| 15     | 0.0164261   | 0.016360397 | 0.016318076 | 0.0163343    | 0.016299478 | 0.016302097 | -0.007549096           |
| 16     | 0.029781003 | 0.029712283 | 0.029716911 | 0.029762189  | 0.029724963 | 0.029713718 | -0.00225932            |
| 17     | 0.03227546  | 0.03224433  | 0.032249532 | 0.032243318  | 0.032235516 | 0.03224216  | -0.001031733           |
| 18     | 0.024269055 | 0.024151393 | 0.024119436 | 0.024162621  | 0.023995747 | 0.023927645 | -0.014067717           |
| 19     | 0.019020683 | 0.018854896 | 0.018836707 | 0.019062688  | 0.01879769  | 0.018867286 | -0.008064742           |
| 20     | 0.019838791 | 0.019705967 | 0.019687815 | 0.019626774  | 0.019596996 | 0.019613561 | -0.011353018           |
| 21     | 0.018107287 | 0.017873632 | 0.017808047 | 0.01765602   | 0.017541487 | 0.017351759 | -0.041725084           |
| 22     | 0.014677042 | 0.014586868 | 0.014587174 | 0.014638027  | 0.014584594 | 0.014562521 | -0.007802668           |
| 23     | 0.032141771 | 0.032104614 | 0.032100769 | 0.032089711  | 0.032068798 | 0.032048363 | -0.002906141           |
| 24     | 0.023052692 | 0.022949843 | 0.022933861 | 0.022924052  | 0.022910279 | 0.022884213 | -0.007308461           |
| 25     | 0.015920161 | 0.015851917 | 0.015866725 | 0.015838628  | 0.015769232 | 0.015718299 | -0.012679663           |
| 26     | 0.015507003 | 0.015152469 | 0.015069967 | 0.014898096  | 0.014556234 | 0.014242179 | -0.081564742           |
| 27     | 0.032612821 | 0.032605005 | 0.032613697 | 0.032613382  | 0.032589994 | 0.032582663 | -0.00092473            |
| 28     | 0.017316156 | 0.017079932 | 0.01703692  | 0.016994161  | 0.016919872 | 0.016953294 | -0.020955075           |
| 29     | 0.015629427 | 0.015495785 | 0.01531856  | 0.015141292  | 0.015094425 | 0.015086703 | -0.034724483           |
| 30     | 0.018425068 | 0.018286196 | 0.018181551 | 0.018013     | 0.017987576 | 0.018039479 | -0.020927404           |
| 31     | 0.026453102 | 0.026303563 | 0.026298242 | 0.026119177  | 0.02610731  | 0.026120522 | -0.012572418           |
| 32     | 0.020427664 | 0.020330291 | 0.020307575 | 0.02019173   | 0.020104443 | 0.020080685 | -0.016985755           |
| 33     | 0.018407267 | 0.017971325 | 0.017582905 | 0.0171117146 | 0.016853467 | 0.016719587 | -0.091685499           |
| 34     | 0.021779975 | 0.021549275 | 0.021440461 | 0.021196292  | 0.020928518 | 0.020770881 | -0.046331279           |

|    |             |             |             |             |             |             |              |
|----|-------------|-------------|-------------|-------------|-------------|-------------|--------------|
| 35 | 0.022250186 | 0.02207182  | 0.022010202 | 0.021874313 | 0.021784826 | 0.021769603 | -0.02159904  |
| 36 | 0.020733903 | 0.02035295  | 0.020229352 | 0.019998723 | 0.019756595 | 0.019733603 | -0.048244655 |
| 37 | 0.087194985 | 0.08716303  | 0.087159341 | 0.087116494 | 0.087067546 | 0.087027686 | -0.001918671 |
| 38 | 0.038488452 | 0.038537986 | 0.0385084   | 0.038501102 | 0.038455006 | 0.038431536 | -0.001478784 |
| 39 | 0.029668046 | 0.029660193 | 0.029651267 | 0.029566134 | 0.029464284 | 0.029432524 | -0.007938571 |
| 40 | 0.029377265 | 0.029379137 | 0.02930265  | 0.029227625 | 0.02922909  | 0.029230342 | -0.005001259 |
| 41 | 0.028900559 | 0.028871339 | 0.028824657 | 0.028812864 | 0.028824557 | 0.028789025 | -0.00385923  |
| 42 | 0.028632786 | 0.028614897 | 0.028665404 | 0.028637881 | 0.02856319  | 0.028537113 | -0.003341404 |

**Table S7.** The change of economic value per unit area in FDA of YRB from 1995 to 2020.

| FDA_NO | 1995yr.     | 2000yr.     | 2005yr.     | 2010yr.     | 2015yr.     | 2020yr.     | change rate(1995-2020) |
|--------|-------------|-------------|-------------|-------------|-------------|-------------|------------------------|
| 1      | 0.289516526 | 0.289864164 | 0.290078551 | 0.302214909 | 0.307159918 | 0.327087706 | 0.129772141            |
| 2      | 0.394275948 | 0.391900093 | 0.394051687 | 0.408474223 | 0.421175375 | 0.436048462 | 0.105947406            |
| 3      | 0.133732029 | 0.133909413 | 0.133994765 | 0.145228008 | 0.148899527 | 0.178887436 | 0.337655888            |
| 4      | 0.171553611 | 0.171749864 | 0.171882308 | 0.172521803 | 0.176407326 | 0.211910311 | 0.235242497            |
| 5      | 0.324716294 | 0.325025329 | 0.325638718 | 0.356927546 | 0.360844075 | 0.364781791 | 0.123386163            |
| 6      | 0.35395654  | 0.354296393 | 0.354959794 | 0.380808688 | 0.385331227 | 0.390521976 | 0.103304875            |
| 7      | 0.142564485 | 0.142835911 | 0.143232151 | 0.154573132 | 0.15894242  | 0.16569153  | 0.162221638            |
| 8      | 0.110249994 | 0.110483011 | 0.110985671 | 0.121268615 | 0.126665976 | 0.146618041 | 0.329868927            |
| 9      | 0.088080699 | 0.088229367 | 0.089081609 | 0.09995849  | 0.104489381 | 0.141857733 | 0.610542777            |
| 10     | 0.181547014 | 0.181887334 | 0.182325094 | 0.1855516   | 0.188671953 | 0.194317704 | 0.070343705            |
| 11     | 0.057754924 | 0.057908372 | 0.058933861 | 0.076759361 | 0.08257169  | 0.155657479 | 1.695137802            |
| 12     | 0.041157891 | 0.041341514 | 0.042544525 | 0.057098468 | 0.064852917 | 0.149654814 | 2.636114767            |
| 13     | 0.026985364 | 0.027146007 | 0.027988019 | 0.047450278 | 0.064084609 | 0.152268272 | 4.642624309            |
| 14     | 0.080552878 | 0.080646454 | 0.081042213 | 0.094500173 | 0.103516446 | 0.160583271 | 0.993513757            |
| 15     | 0.146937759 | 0.147055625 | 0.147469112 | 0.163304507 | 0.169293723 | 0.197354334 | 0.343115169            |
| 16     | 0.37493645  | 0.375839622 | 0.375409488 | 0.394506981 | 0.404075368 | 0.416384459 | 0.11054676             |
| 17     | 0.238653559 | 0.238931755 | 0.239521151 | 0.242969014 | 0.246539535 | 0.252591844 | 0.058403845            |
| 18     | 0.254232925 | 0.254626343 | 0.255682625 | 0.26229452  | 0.270163456 | 0.278473934 | 0.095349604            |
| 19     | 0.212224913 | 0.212543235 | 0.213599006 | 0.217578338 | 0.224831531 | 0.236533401 | 0.114541162            |
| 20     | 0.243367379 | 0.243727715 | 0.244592555 | 0.253295514 | 0.262586101 | 0.271758884 | 0.116661094            |
| 21     | 0.21581965  | 0.216304224 | 0.216921438 | 0.222610932 | 0.236853384 | 0.253713716 | 0.175582094            |
| 22     | 0.080948227 | 0.081175796 | 0.081815382 | 0.086564388 | 0.097198518 | 0.18094928  | 1.235370531            |
| 23     | 0.281959984 | 0.282406502 | 0.283271314 | 0.287048459 | 0.293560097 | 0.322381762 | 0.143359983            |
| 24     | 0.343860385 | 0.344342383 | 0.344526082 | 0.347367962 | 0.359187018 | 0.384531909 | 0.118279178            |
| 25     | 0.368257434 | 0.368952001 | 0.368840638 | 0.372271019 | 0.382716817 | 0.408321088 | 0.108792522            |
| 26     | 0.437276031 | 0.444507388 | 0.437857366 | 0.456209863 | 0.448498922 | 0.463417314 | 0.05978211             |
| 27     | 0.272296639 | 0.272676555 | 0.273513185 | 0.276801151 | 0.283456911 | 0.296761341 | 0.089845776            |
| 28     | 0.248975117 | 0.249984081 | 0.249689256 | 0.254590161 | 0.266564232 | 0.277946998 | 0.116364564            |
| 29     | 0.31540505  | 0.315681651 | 0.31601866  | 0.316398043 | 0.319829039 | 0.327452939 | 0.03819815             |
| 30     | 0.166031573 | 0.166058034 | 0.166138526 | 0.166293517 | 0.168580386 | 0.178277633 | 0.073757417            |
| 31     | 0.19153213  | 0.191534178 | 0.191613995 | 0.193957596 | 0.196709396 | 0.204296134 | 0.066641584            |
| 32     | 0.379411895 | 0.381600934 | 0.383404465 | 0.383096235 | 0.397768849 | 0.411216275 | 0.083825469            |

|    |             |             |             |             |             |             |             |
|----|-------------|-------------|-------------|-------------|-------------|-------------|-------------|
| 33 | 0.392335253 | 0.398375926 | 0.403982025 | 0.468833799 | 0.663042647 | 0.663850799 | 0.692049832 |
| 34 | 0.353650757 | 0.359130627 | 0.355752481 | 0.361529449 | 0.382302652 | 0.432904443 | 0.224101559 |
| 35 | 0.322926626 | 0.33335428  | 0.32473721  | 0.327238633 | 0.356842032 | 0.403784978 | 0.250392336 |
| 36 | 0.425251119 | 0.426505835 | 0.427722397 | 0.429226344 | 0.460730559 | 0.47331326  | 0.113020611 |
| 37 | 0.222260221 | 0.225213868 | 0.229053809 | 0.229436676 | 0.259579188 | 0.570181319 | 1.565377266 |
| 38 | 0.135774533 | 0.135692507 | 0.135935804 | 0.144990243 | 0.145917126 | 0.165357214 | 0.217880929 |
| 39 | 0.249872975 | 0.249744539 | 0.249975432 | 0.254032326 | 0.255279657 | 0.270827798 | 0.083861901 |
| 40 | 0.30948122  | 0.309816253 | 0.315111615 | 0.329906295 | 0.342940392 | 0.372336501 | 0.203098855 |
| 41 | 0.282178656 | 0.28304481  | 0.288743392 | 0.291246696 | 0.295200213 | 0.296546615 | 0.050917953 |
| 42 | 0.230756935 | 0.230962005 | 0.23124421  | 0.24439296  | 0.246275746 | 0.253678859 | 0.099333632 |

**Table S8.** The validation accuracy of FCV.

| FDA_NO | 2010        | 2015        | 2020        |
|--------|-------------|-------------|-------------|
| 1      | 0.097560976 | 0.195121951 | 0.341463415 |
| 2      | 0.975609756 | 0.975609756 | 1           |
| 3      | 0.975609756 | 0.829268293 | 0.829268293 |
| 4      | 0.902439024 | 0.512195122 | 0.804878049 |
| 5      | 0.853658537 | 0.365853659 | 0.853658537 |
| 6      | 0           | 0.390243902 | 0.12195122  |
| 7      | 0.634146341 | 0.951219512 | 0.731707317 |
| 8      | 0.829268293 | 0.43902439  | 0.756097561 |
| 9      | 0.853658537 | 0.926829268 | 0.731707317 |
| 10     | 0.292682927 | 0.292682927 | 0.609756098 |
| 11     | 0.853658537 | 0.951219512 | 0.682926829 |
| 12     | 0.707317073 | 0.829268293 | 0.707317073 |
| 13     | 0.975609756 | 0.975609756 | 0.975609756 |
| 14     | 0.951219512 | 0.804878049 | 0.829268293 |
| 15     | 0.951219512 | 0.87804878  | 1           |
| 16     | 0.682926829 | 0.731707317 | 0.634146341 |
| 17     | 0.804878049 | 0.536585366 | 0.56097561  |
| 18     | 0.951219512 | 0.926829268 | 0.756097561 |
| 19     | 0.731707317 | 0.902439024 | 0.707317073 |
| 20     | 0.731707317 | 0.731707317 | 0.87804878  |
| 21     | 0.853658537 | 0.804878049 | 0.804878049 |
| 22     | 0.853658537 | 0.902439024 | 0.853658537 |
| 23     | 0.804878049 | 0.682926829 | 0.487804878 |
| 24     | 0.536585366 | 0.512195122 | 0.414634146 |
| 25     | 0.902439024 | 0.853658537 | 0.87804878  |
| 26     | 0.975609756 | 0.658536585 | 0.87804878  |
| 27     | 0.414634146 | 0.390243902 | 0.195121951 |
| 28     | 0.365853659 | 0.365853659 | 0.414634146 |
| 29     | 0.463414634 | 0.512195122 | 0.658536585 |
| 30     | 0.43902439  | 0.414634146 | 0.463414634 |

|    |             |             |             |
|----|-------------|-------------|-------------|
| 31 | 0.804878049 | 0.853658537 | 0.829268293 |
| 32 | 0.609756098 | 0.585365854 | 0.56097561  |
| 33 | 0.731707317 | 0.658536585 | 0.707317073 |
| 34 | 0.853658537 | 0.682926829 | 0.804878049 |
| 35 | 0.780487805 | 0.731707317 | 0.902439024 |
| 36 | 0.829268293 | 0.609756098 | 0.853658537 |
| 37 | 0.87804878  | 0.902439024 | 0.975609756 |
| 38 | 0.804878049 | 0.829268293 | 0.87804878  |
| 39 | 0.926829268 | 1           | 0.951219512 |
| 40 | 0.682926829 | 0.853658537 | 0.829268293 |
| 41 | 0.512195122 | 0.926829268 | 0.853658537 |
| 42 | 0.707317073 | 0.682926829 | 0.682926829 |

---
